# Supplementary material for: Thermo- and photo-modulation of exciplex fluorescence in a 3D spin crossover Hofmann-type coordination polymer
Source: PubMed Central journal article supplement — Chem Sci. 2018 Sep 11;9(44):8446–52. doi: 10.1039/c8sc02677g (PMC6247521; doi:10.1039/c8sc02677g), 2018-09-11

## Electronic Supplementary Information

### Thermo- and photo-modulation of exciplex fluorescence in a 3D spin crossover Hofmann-type coordination polymer

T. Delgado, M. Meneses-Sánchez, L. Piñeiro-López, C. Bartual-Murgui, M. C. Muñoz, J. A. Real.

#### Experimental Section

##### Materials

K[Au(CN)<sub>2</sub>], Fe(BF<sub>4</sub>)<sub>2</sub>·7H<sub>2</sub>O and Zn(BF<sub>4</sub>)<sub>2</sub>·7H<sub>2</sub>O were purchased from commercial sources and used as received whereas the synthesis of the bpben ligand was performed as described elsewhere.<sup>1</sup>

##### Crystal growth

Single crystals of **1Fe@pyr** were grown by slow liquid-liquid diffusion technique using a modified H-vessel with a third tube added due to the limited solubility of the bpben in methanol where the Fe(BF<sub>4</sub>)<sub>2</sub>·6H<sub>2</sub>O and K[Au(CN)<sub>2</sub>] salts were dissolved. The peripheral tubes (total volume ca. 10 mL) contained Fe(BF<sub>4</sub>)<sub>2</sub>·6H<sub>2</sub>O (0.049 mmol, 16.47 mg) and K[Au(CN)<sub>2</sub>] (0.098 mmol, 33.38 mg) salts, respectively. The central tube (total volume ca. 10 mL) contained bpben ligand (0.058 mmol, 13.58 mg). Each individual tube was filled with methanol and finally with a saturated solution of pyrene in methanol. Afterwards, the tubes were closed and two weeks later, light-yellow single crystals were formed in the tube which originally contained Fe(BF<sub>4</sub>)<sub>2</sub>·6H<sub>2</sub>O salt with relative high yield (ca. 50%). The synthesis of the homologue **1Zn@pyr** was carried out following the same procedure.

EDX analysis (Energy dispersive X-Ray analysis) confirmed the stoichiometric relationship between metallic coordination centers [Fe: Au] and [Zn: Au] = [1:2]. *Elemental Analysis* for **1Fe@pyr**: Calculated for C<sub>36</sub>H<sub>22</sub>Au<sub>2</sub>FeN<sub>6</sub> (988.4) (%): C 43.75; H 2.24; N 8.50. Found (%): C 44.40; H 2.31; N 8.35. *Elemental Analysis* for **1Zn@pyr**: Calculated for C<sub>36</sub>H<sub>22</sub>Au<sub>2</sub>ZnN<sub>6</sub> (997.9) (%): C 43.33; H 2.22; N 8.42. Found (%): C 43.75; H 2.29; N 8.28.

##### Physical characterization

###### *Single crystal absorption spectroscopy.*

Single crystals of **1Fe@pyr** and **1Zn@pyr** were mounted on a copper plate with a previously drilled hole. One crystal was deposited in the middle of the hole and fixed with silver paste to ensure a good thermal

conductivity. The sample was then introduced into a closed cycle cryostat (Janis-Sumimoto SHI-4.5), which operates between 4 and 300 K and is equipped with a programmable temperature controller (Lakeshore Model 331). The cryostat was introduced into a double beam spectrometer (Varian Cary 5000).

#### ***Photoluminescence spectroscopy***

The excitation and luminescence spectra were recorded on a Fluorolog 3-22 (Horiba Jobin Yvon), equipped with a water-cooled photo multiplier tube (PMT). A calibration function was applied to account for the wavelength-dependent sensitivity of the photomultiplier tube, the wavelength dependent sensitivity of the photomultiplier tube, the throughput of the analyzing monochromator and the power fluctuation of the xenon lamp. For the ambient temperature measurements a quartz capillary was filled with 5 mg of the **1Fe@pyr** or **1Zn@pyr** crystals. For the temperature dependence measurements an ensemble of **1Fe@pyr** or **1Zn@pyr** crystal are deposited in a cooper plate and fixed with silver paste nanoparticles to ensure a good thermal conductivity. The sample was then introduced into a closed cycle cryostat (Janis-Sumimoto SHI-4.5), which operates between 4 and 300 K and is equipped with a programmable temperature controller (Lakeshore Model 331). The cryostat was introduced in the Fluorolog.

#### ***Magnetic and Photomagnetic measurements***

The variable temperature magnetic susceptibility measurements were carried out by using microcrystalline samples (15-20 mg) of the **1Fe@pyr**, using a Quantum Design MPMS2 SQUID susceptometer equipped with a 5.5 T magnet, operating at 1 T and at temperatures from 300-1.8 K. Experimental susceptibilities were corrected for diamagnetism of the constituent atoms by the use of Pascal's constants.

#### ***Differential Scanning Calorimetry (DSC)***

Calorimetric measurements were performed using a differential scanning calorimeter Mettler Toledo DSC 821e. Low temperatures were obtained with an aluminium block attached to the sample holder, refrigerated with a flow of liquid nitrogen and stabilized at a temperature of 110 K. The sample holder was kept in a dry box under a flow of dry nitrogen gas to avoid water condensation. The measurements were carried out using around 20 mg of powdered sample sealed in aluminium pans with a mechanical crimp. Temperature and heat flow calibrations were made with standard samples of indium by using its melting transition (429.6 K, 28.45 J g<sup>-1</sup>). An overall accuracy of  $\pm 0.2$  K in temperature and  $\pm 2\%$  in the heat capacity is estimated. The uncertainty increases for the determination of the anomalous enthalpy and entropy due to the subtraction of an unknown baseline.

#### ***Single-Crystal X-ray Diffraction***

Single-crystal X-ray data were collected with an Oxford Diffraction Supernova diffractometer. In all cases, Mo-K $\alpha$  radiation ( $\lambda = 0.71073$ ) was used. Data scaling and empirical or multiscan absorption corrections were performed. The structures were solved by direct methods with SIR2004<sup>2</sup> and refined

by full-matrix least squares techniques on  $F^2$  with SHELXL.<sup>3</sup> Non-hydrogen atoms were refined anisotropically, and hydrogen atoms were placed in calculated positions and refined in idealized geometries (riding model) with fixed isotropic displacement parameters. Relevant crystallographic data, bond lengths and angles for **1Fe@pyr** and **1Zn@pyr** are gathered in Tables S1- S3. CCDC 1847351-1847353 and 1862017 contain the supplementary crystallographic data for this paper. These data can be obtained free of charge from The Cambridge Crystallographic Data Centre.

**Table S1.** Crystal data of compounds **1Fe@pyr** and **1Zn@pyr**.

| <i>T</i> (K)                                                  | Fe 120 K                                                                        | Fe 280 K   | Zn 120 K                                                                        | Zn 280 K    |
|---------------------------------------------------------------|---------------------------------------------------------------------------------|------------|---------------------------------------------------------------------------------|-------------|
| Empirical formula                                             | C <sub>72</sub> H <sub>44</sub> N <sub>12</sub> Au <sub>4</sub> Fe <sub>2</sub> |            | C <sub>72</sub> H <sub>44</sub> N <sub>12</sub> Au <sub>4</sub> Zn <sub>2</sub> |             |
| Mr                                                            | 1976.76                                                                         |            | 1995.80                                                                         |             |
| Crystal system                                                |                                                                                 | monoclinic |                                                                                 |             |
| Space group                                                   | <i>Cc</i>                                                                       | <i>Cc</i>  | <i>Cc</i>                                                                       | <i>Cc</i>   |
| <i>a</i> (Å)                                                  | 33.2202(13)                                                                     | 33.557(6)  | 33.219(3)                                                                       | 33.4492(11) |
| <i>b</i> (Å)                                                  | 13.2404(5)                                                                      | 13.117(2)  | 12.9438(10)                                                                     | 13.0989(5)  |
| <i>c</i> (Å)                                                  | 15.2020(5)                                                                      | 16.174(2)  | 16.3125(13)                                                                     | 16.2467(6)  |
| $\beta$                                                       | 113.3920(10)                                                                    | 112.407(5) | 111.934(3)                                                                      | 112.538(3)  |
| <i>V</i> (Å <sup>3</sup> )                                    | 6137.0(4)                                                                       | 6581.7(19) | 6506.4(9)                                                                       | 6574.8(4)   |
| <i>Z</i>                                                      | 4                                                                               |            |                                                                                 |             |
| <i>F</i> (000)                                                | 3712                                                                            |            | 3744                                                                            |             |
| <i>D<sub>c</sub></i> (mg cm <sup>-3</sup> )                   | 2.139                                                                           | 1.995      | 2.037                                                                           | 2.016       |
| $\mu$ (Mo-K $\alpha$ )(mm <sup>-1</sup> )                     | 10.042                                                                          | 9.364      | 9.763                                                                           | 9.662       |
| No. of total reflections [ <i>I</i> >2 $\sigma$ ( <i>I</i> )] | 23132                                                                           | 10829      | 27866                                                                           | 7442        |
| <i>R</i> [ <i>I</i> >2 $\sigma$ ( <i>I</i> )]                 | 0.0438                                                                          | 0.0404     | 0.0738                                                                          | 0.0679      |
| <i>wR</i> [ <i>I</i> >2 $\sigma$ ( <i>I</i> )]                | 0.0809                                                                          | 0.0716     | 0.1969                                                                          | 0.0766      |
| <i>S</i>                                                      | 1.090                                                                           | 1.012      | 1.054                                                                           | 0.970       |

## References

- (1) Culp, J. T.; Madden, C.; Kauffman, K.; Shi, F.; Matranga, C. *Inorg Chem.* **2013**, *52*, 4205-4216.
- (2) Burla, M. C.; Caliendo, R.; Camalli, M.; Carrozzini, B.; Cascarano, G. L.; De Caro, L.; Giacovazzo, C.; Polidori, G.; Spagna, R. *J. Appl. Cryst.* **2005**, *38*, 381-388 (SIR2004)
- (3) Sheldrick, G. M. *Acta Crystallogr C Struct Chem.* 2015 Jan 1; 71(Pt 1): 3–8. (SHELXL 2015)

**Table S2.** Fe-N and Zn-N bond lengths (Å) for **1Fe@pyr** and **1Zn@pyr** respectively.

|        | <b>M = Fe</b> |              | <b>M = Zn</b> |              |
|--------|---------------|--------------|---------------|--------------|
|        | <b>120 K</b>  | <b>280 K</b> | <b>120 K</b>  | <b>280 K</b> |
| M1-N1  | 2.015(8)      | 2.220(10)    | 2.187(11)     | 2.19(2)      |
| M1-N2  | 2.011(7)      | 2.208(11)    | 2.159(12)     | 2.16(2)      |
| M1-N3  | 1.940(8)      | 2.163(11)    | 2.180(15)     | 2.18(2)      |
| M1-N4  | 1.937(8)      | 2.137(11)    | 2.110(14)     | 2.10(3)      |
| M1-N5  | 1.958(8)      | 2.179(11)    | 2.172(13)     | 2.20(3)      |
| M1-N6  | 1.930(8)      | 2.140(11)    | 2.136(13)     | 2.14(2)      |
| M2-N7  | 2.009(7)      | 2.169(10)    | 2.126(12)     | 2.14(2)      |
| M2-N8  | 1.999(7)      | 2.136(10)    | 2.156(12)     | 2.14(2)      |
| M2-N9  | 1.920(7)      | 2.109(12)    | 2.128(15)     | 2.17(3)      |
| M2-N10 | 1.934(7)      | 2.125(11)    | 2.147(14)     | 2.18(2)      |
| M2-N11 | 1.936(7)      | 2.147(11)    | 2.133(14)     | 2.14(2)      |
| M2-N12 | 1.926(7)      | 2.104(12)    | 2.115(14)     | 2.16(3)      |
| dM-N   | 1.965/1.954   | 2.175/2.132  | 2.157/2.134   | 2.16/2.16    |

**Table S3.** N-Fe-N and N-Zn-N bond angles (°) for **1Fe@pyr** and **1Zn@pyr** respectively.

|            | <b>M = Fe</b> |              | <b>M = Zn</b> |              |
|------------|---------------|--------------|---------------|--------------|
|            | <b>120 K</b>  | <b>280 K</b> | <b>120 K</b>  | <b>280 K</b> |
| N1-M1-N2   | 179.4(4)      | 178.5(5)     | 178.9(5)      | 178.5(12)    |
| N1-M1-N3   | 92.3(3)       | 93.6(4)      | 92.9(5)       | 91.9(9)      |
| N1-M1-N4   | 88.3(3)       | 89.1(4)      | 88.9(5)       | 89.8(10)     |
| N1-M1-N5   | 90.5(3)       | 89.9(4)      | 89.6(5)       | 90.0(9)      |
| N1-M1-N6   | 88.8(3)       | 88.5(4)      | 88.5(5)       | 88.3(9)      |
| N2-M1-N3   | 88.0(3)       | 87.6(4)      | 88.1(5)       | 87.3(9)      |
| N2-M1-N4   | 91.3(3)       | 89.7(4)      | 90.1(6)       | 91.0(10)     |
| N2-M1-N5   | 90.0(3)       | 90.9(4)      | 90.8(5)       | 91.3(10)     |
| N2-M1-N6   | 90.7(3)       | 90.6(4)      | 91.0(5)       | 90.3(10)     |
| N3-M1-N4   | 179.4(4)      | 177.2(6)     | 178.2(7)      | 178.2(12)    |
| N3-M1-N5   | 91.3(3)       | 91.4(4)      | 91.8(5)       | 91.3(9)      |
| N3-M1-N6   | 89.0(3)       | 88.8(5)      | 87.1(6)       | 87.1(10)     |
| N4-M1-N5   | 88.7(3)       | 88.0(5)      | 88.5(5)       | 89.4(12)     |
| N4-M1-N6   | 90.9(3)       | 91.9(5)      | 92.7(6)       | 92.3(11)     |
| N5-M1-N6   | 179.3(4)      | 178.4(5)     | 177.8(6)      | 177.6(11)    |
| N7-M2-N8   | 178.9(3)      | 179.3(5)     | 178.6(5)      | 178.3(10)    |
| N7-M2-N9   | 89.9(3)       | 89.5(4)      | 90.3(5)       | 89.3(9)      |
| N7-M2-N10  | 91.7(3)       | 89.9(4)      | 89.1(5)       | 89.7(9)      |
| N7-M2-N11  | 89.1(3)       | 92.3(4)      | 91.9(5)       | 93.1(9)      |
| N7-M2-N12  | 89.5(3)       | 90.0(4)      | 90.4(6)       | 88.5(9)      |
| N8-M2-N9   | 90.5(3)       | 89.9(4)      | 90.5(6)       | 89.3(9)      |
| N8-M2-N10  | 89.4(3)       | 90.0(4)      | 89.7(5)       | 91.3(9)      |
| N8-M2-N11  | 90.4(3)       | 88.3(4)      | 87.3(6)       | 88.3(9)      |
| N8-M2-N12  | 89.4(3)       | 90.1(4)      | 90.8(6)       | 90.4(9)      |
| N9-M2-N10  | 88.3(3)       | 87.0(5)      | 88.6(7)       | 88.6(11)     |
| N9-M2-N11  | 178.8(4)      | 178.1(5)     | 177.6(6)      | 177.6(11)    |
| N9-M2-N12  | 91.1(3)       | 91.3(4)      | 90.2(7)       | 90.5(10)     |
| N10-M2-N11 | 92.4(3)       | 92.4(4)      | 90.4(6)       | 91.6(8)      |
| N10-M2-N12 | 178.7(3)      | 178.3(5)     | 178.7(8)      | 178.0(12)    |
| N11-M2-N12 | 88.2(3)       | 89.3(5)      | 90.9(7)       | 89.4(10)     |

**Figure S1.** Coordination centers Fe1 and Fe2.

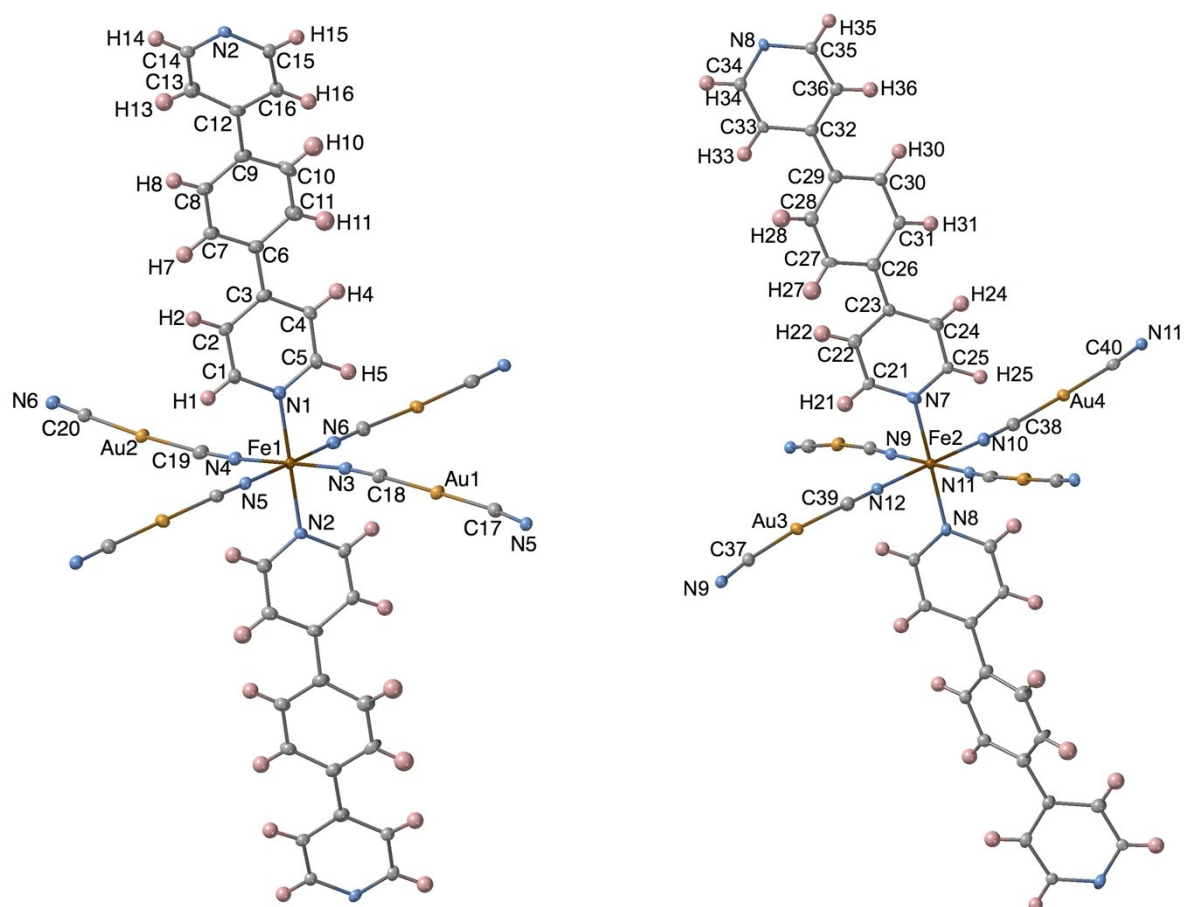

Intermolecular short  $\pi$ - $\pi$  contacts between pyrene and bpben for **1Fe@pyr**.

|                      |        |         |       |                      |        |         |       |
|----------------------|--------|---------|-------|----------------------|--------|---------|-------|
| C66                  | C3     | 3.56886 | 3.610 | C54                  | C23    |         | 3.679 |
| C70                  | C2     | 3.57762 |       | C56                  | C23    | 3.57    |       |
| C60                  | C6     | 3.60622 |       |                      |        |         |       |
| C70                  | C3     | 3.66019 |       |                      |        |         |       |
| C68                  | C11    | 3.66169 |       |                      |        |         |       |
| C70                  | C4     | 3.66507 | 3.558 |                      |        |         |       |
| C61                  | C10    | 3.67164 |       |                      |        |         |       |
| <b>Framework Zn1</b> |        |         |       | <b>Framework Zn2</b> |        |         |       |
| C66                  | C7     | 3.61272 | d/Å   | Pyrene2              | Bpben2 | d/Å120K | d/Å   |
| Pyrene1              | Bpben1 | 3.62590 | 280K  |                      |        |         |       |
| C57                  | C12    | 3.6025  |       |                      |        |         |       |
| C63                  | C7     | 3.6025  |       |                      |        |         |       |
| C62                  | C12    | 3.5758  | 3.63  | C53                  | C33    | 3.37    | 3.53  |
| C76                  | C2     | 3.5782  | 3.51  | C45                  | C32    | 3.62    | 3.61  |
| C67                  | C5     | 3.6022  | 3.628 | C53                  | C32    | 3.54    | 3.57  |
| C65                  | C3     | 3.6019  | 3.52  | C53                  | C29    | 3.54    | 3.55  |
| C60                  | C7     | 3.614   | 3.42  | C52                  | C29    | 3.60    | 3.61  |
| C68                  | C1     | 3.66189 | 3.62  | C44                  | C30    | 3.68    | 3.71  |
| C60                  | C6     | 3.57    | 3.55  | C52                  | C30    | 3.63    | 3.68  |
| C76                  | C4     | 3.66507 | 3.689 | C50                  | C30    | 3.53    | 3.54  |
| C62                  | C9     | 3.50    | 3.55  | C51                  | C30    | 3.54    | 3.53  |
| C67                  | C9     | 3.53    | 3.689 | C51                  | C31    | 3.40    | 3.46  |
| C69                  | C4     | 3.53    | 3.55  | C56                  | C31    | 3.52    | 3.57  |
| C62                  | C1     | 3.35    | 3.58  | C56                  | C26    | 3.58    | 3.64  |
| C64                  | C8     | 3.35    | 3.58  | C56                  | C23    | 3.64    | 3.66  |
| C65                  | C2     | 3.54    | 3.55  | C50                  | C31    | 3.64    | 3.68  |
| C66                  | C6     | 3.55    | 3.57  |                      |        |         |       |
| C62                  | C9     | 3.50    | 3.55  |                      |        |         |       |
| C58                  | C8     | -       | 3.63  |                      |        |         |       |
| C63                  | C2     | 3.69    | -     |                      |        |         |       |
| C65                  | C4     | 3.66    | -     |                      |        |         |       |
| C65                  | C3     | 3.48    | 3.50  |                      |        |         |       |
| C60                  | C8     | 3.67    | 3.63  |                      |        |         |       |
| C66                  | C3     | 3.57    | 3.61  |                      |        |         |       |
| C64                  | C2     | 3.38    | 3.43  |                      |        |         |       |
| C61                  | C8     | 3.44    | 3.50  |                      |        |         |       |
| C57                  | C8     | 3.49    | 3.43  |                      |        |         |       |
| C70                  | C4     | 3.50    | 3.52  |                      |        |         |       |
| C70                  | C5     | 3.31    | 3.31  |                      |        |         |       |
| C69                  | C10    | 3.57    | 3.58  |                      |        |         |       |
| C61                  | C9     | 3.48    | 3.54  |                      |        |         |       |
| C69                  | C9     | 3.64    | 3.58  |                      |        |         |       |
| C64                  | C1     | 3.53    | 3.63  |                      |        |         |       |

**Table S4-cont.** Intermolecular short  $\pi$ - $\pi$  contacts between pyrene and bpben for 1Zn@pyr.

**Figure S2.** Overlay of a representative fragment of the frameworks and pyrene molecule at 280 K (red) and 120 K (green) for (a) Fe(1), (b) Fe(2), (c) Zn(1) and (d) Zn(2) sites.



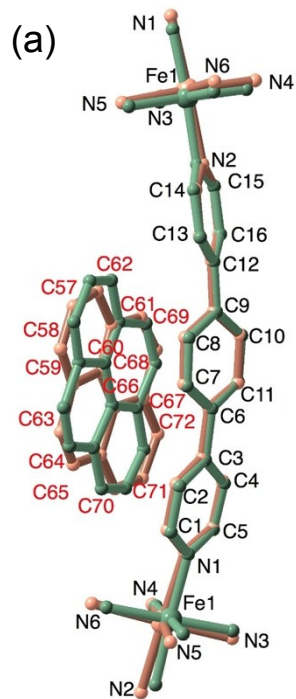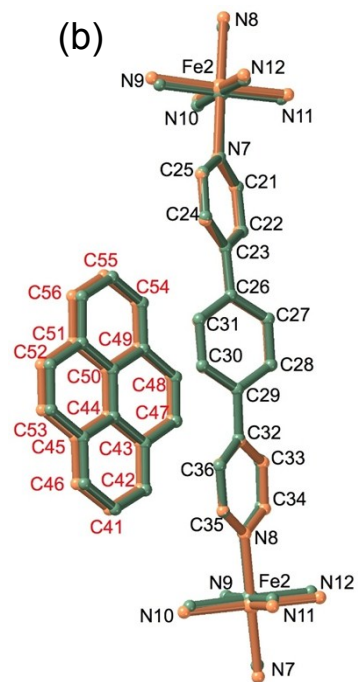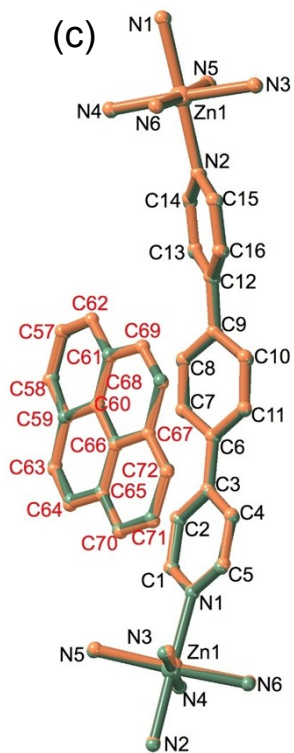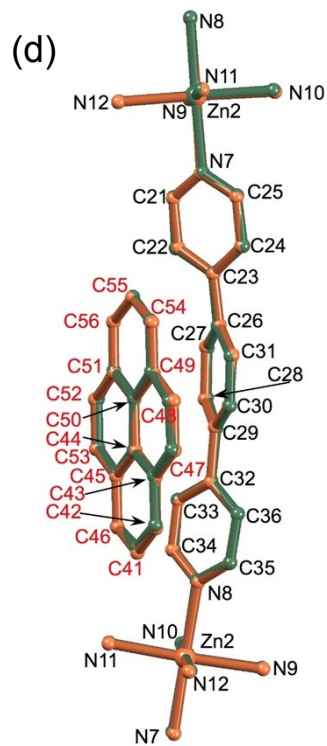

**Table S5.** Geometrical distortion of the bpben ligands: (a) Out of benzene plane distances,  $D$  (Å), of the pyridine N atoms coordinated to  $\text{Fe}^{\text{II}}$  (see Scheme I below); (b) Dihedral angles defined between the benzene and pyridine rings. The pyridine rings are denoted by the corresponding N atom.

| (a)             | Distance $D$ from benzene plane (Å) |            |                |            |
|-----------------|-------------------------------------|------------|----------------|------------|
|                 | <b>1Fe@pyr</b>                      |            | <b>1Zn@pyr</b> |            |
| Compound        | <b>120</b>                          | <b>280</b> | <b>120</b>     | <b>280</b> |
| T/K             |                                     |            |                |            |
| N-pyridine atom |                                     |            |                |            |
| N1              | 0.545                               | 0.583      | 0.663          | 0.713      |
| N2              | 0.816                               | 0.699      | 0.619          | 0.645      |
| N7              | 0.650                               | 0.424      | 0.416          | 0.457      |
| N8              | 0.556                               | 0.494      | 0.557          | 0.685      |

| (b)           | Dihedral angle pyridine-benzene planes (°) |            |                |            |
|---------------|--------------------------------------------|------------|----------------|------------|
|               | <b>1Fe@pyr</b>                             |            | <b>1Zn@pyr</b> |            |
| Compound      | <b>120</b>                                 | <b>280</b> | <b>120</b>     | <b>280</b> |
| T/K           |                                            |            |                |            |
| Pyridine ring |                                            |            |                |            |
| N1            | 11.0                                       | 10.9       | 11.9           | 13.0       |
| N2            | 27.7                                       | 27.7       | 28.9           | 28.3       |
| N7            | 34.1                                       | 34.3       | 35.5           | 27.4       |
| N8            | 30.0                                       | 26.1       | 29.7           | 32.8       |

**Scheme I.** View illustrating the separation of the pyridine N atoms from the average benzene plane as a measure of the bent nature of the bp

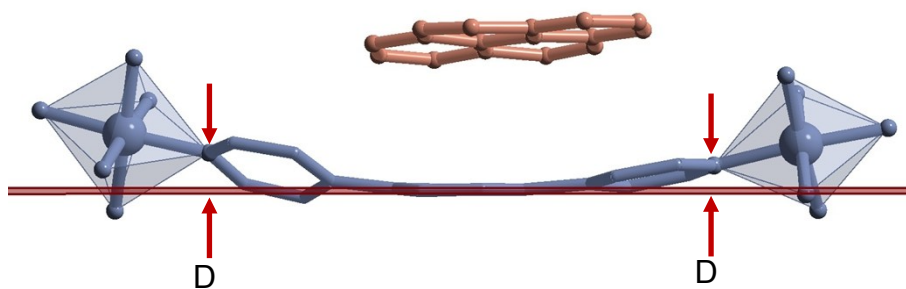

**Figure S3.** Absorption spectra of a single crystal of **1Fe@pyr** at room temperature and 10 K in the HS (red) and LS (blue) state respectively (left) and temperature variable absorption spectra of **1Fe@pyr** in the cooling mode (right).

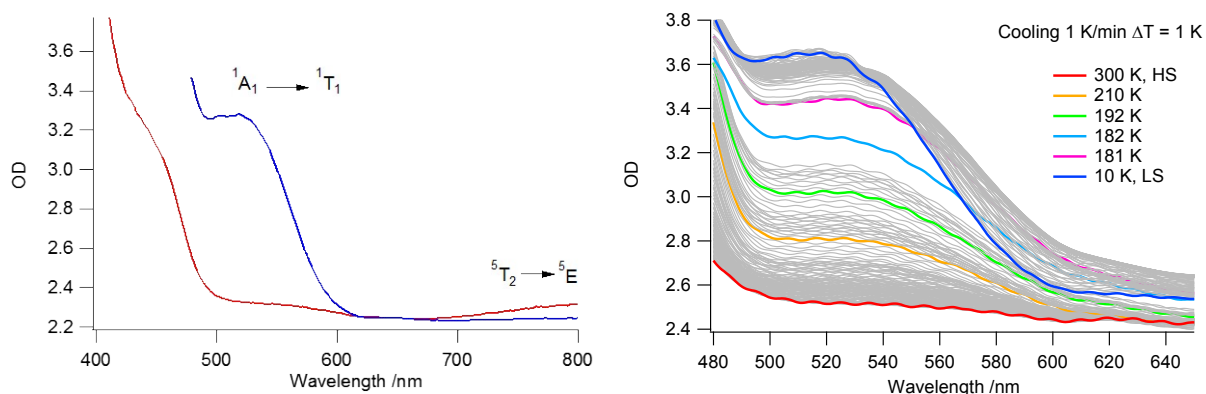

**Figure S4.** Evolution of the absorption spectra at variable temperature during cooling (top left) and heating (top right) at 5 K/min, and corresponding HS fraction as a function of the temperature established from the optical density difference between 575 and 650 nm (bottom).

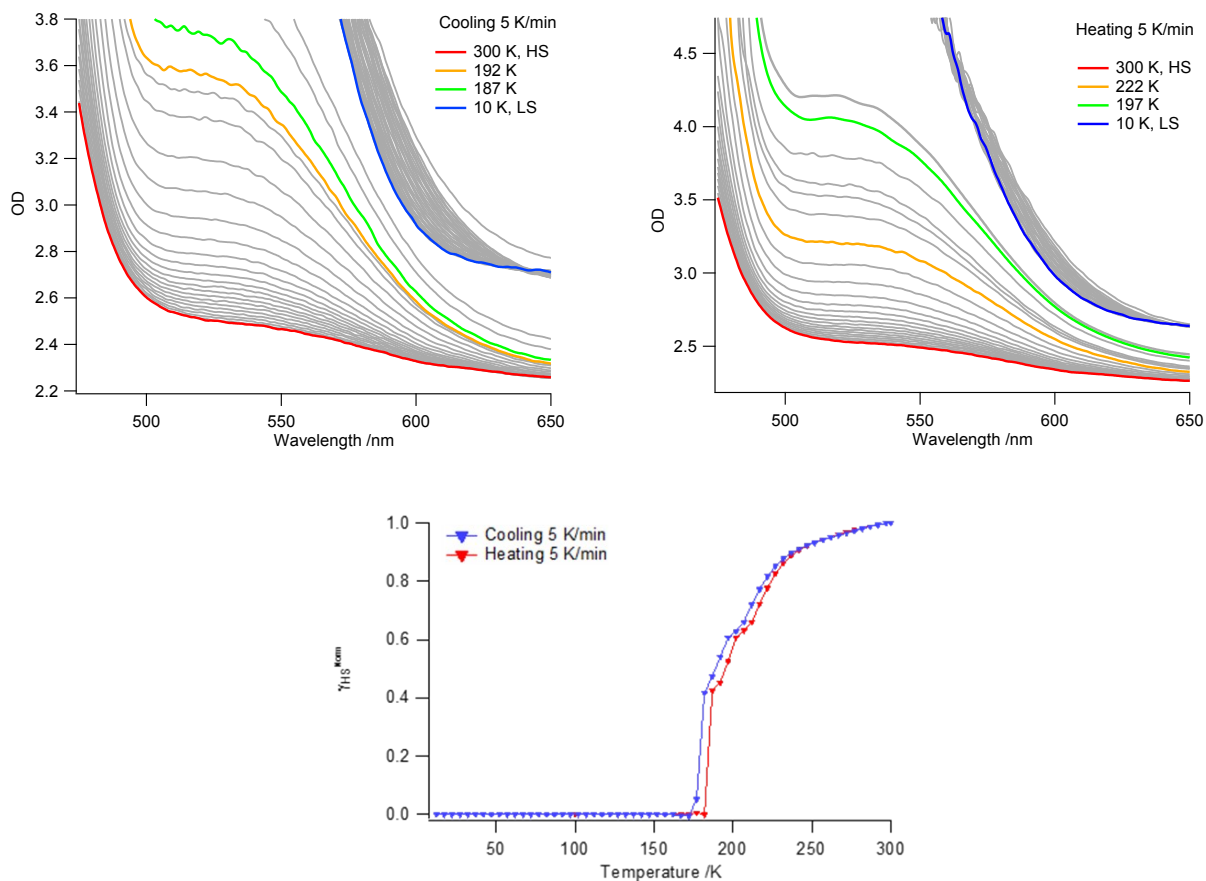

**Figure S5.** Evolution of the absorption spectra during the HS to LS relaxation after LIESST during heating from 10 to 60 K at 0.3 K/min.

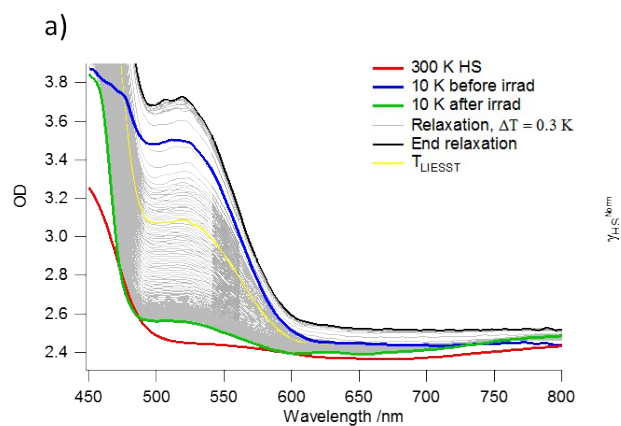

**Figure S6.** Excitation spectrum of the sample between 250 and 490 nm recorded at 520 nm and corresponding emission spectrum after excitation at 332 nm.

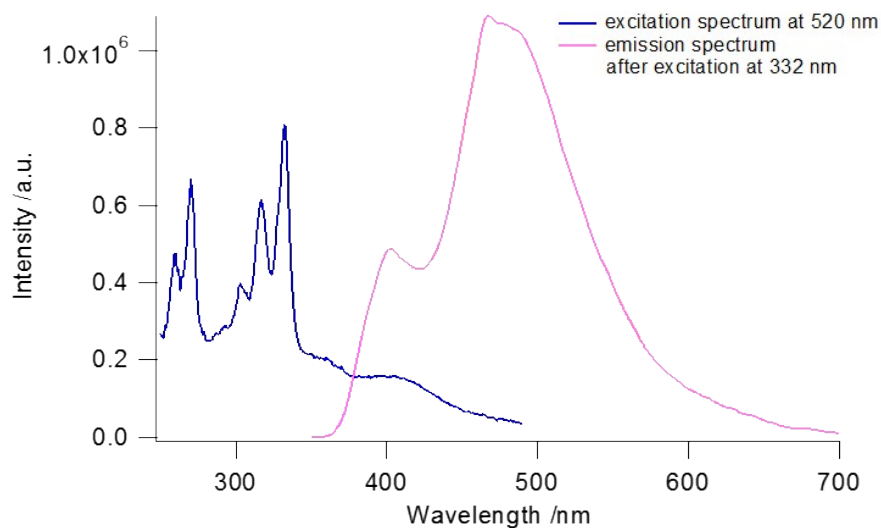

**Figure S7.** Evolution of the photoluminescence spectra with the temperature during heating at 5 K/min from 10 K to 300 K.

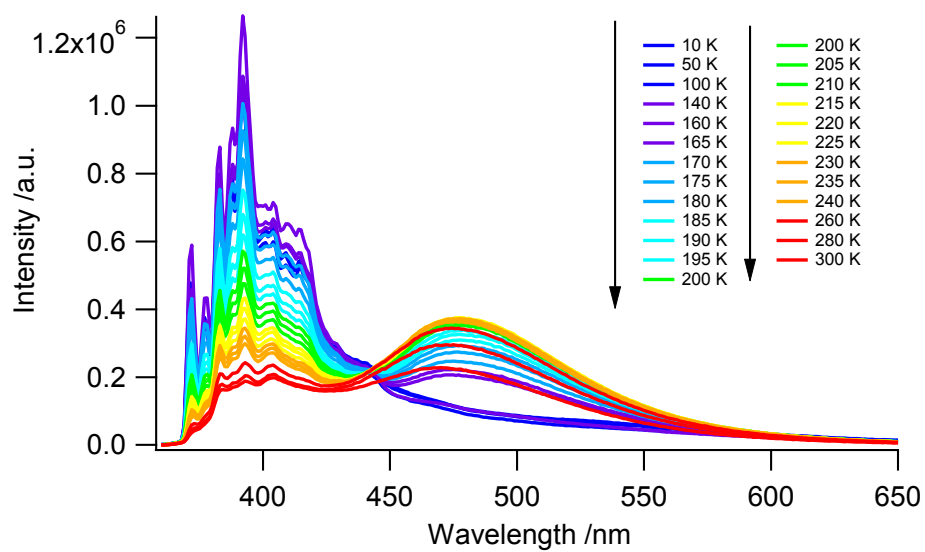

Supplement: SC-009-C8SC02677G-s001.pdf [file SC-009-C8SC02677G-s001.pdf]
